# Supplementary material
Source: PubMed Central journal article supplement (PMC3562846)
Supplement: 1220824110_pnas.201220824SI.pdf [file 1220824110_pnas.201220824SI.pdf]

# Supporting Information

Hong et al. 10.1073/pnas.1220824110

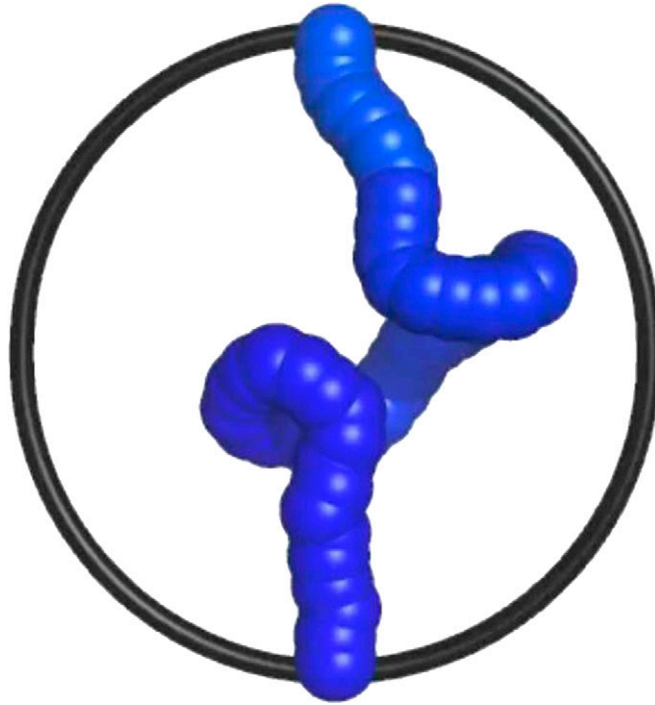

**Movie S1.** Feeding of polymer into a cell-like confinement. Sample Brownian dynamics simulation of the confinement being filled by an emerging supercoiling polymer, as explained in the text. The final polymer contour length (800 beads) corresponds to 24,910 bp. The polymer strand's color varies along its length from blue to red.

[Movie S1](#)

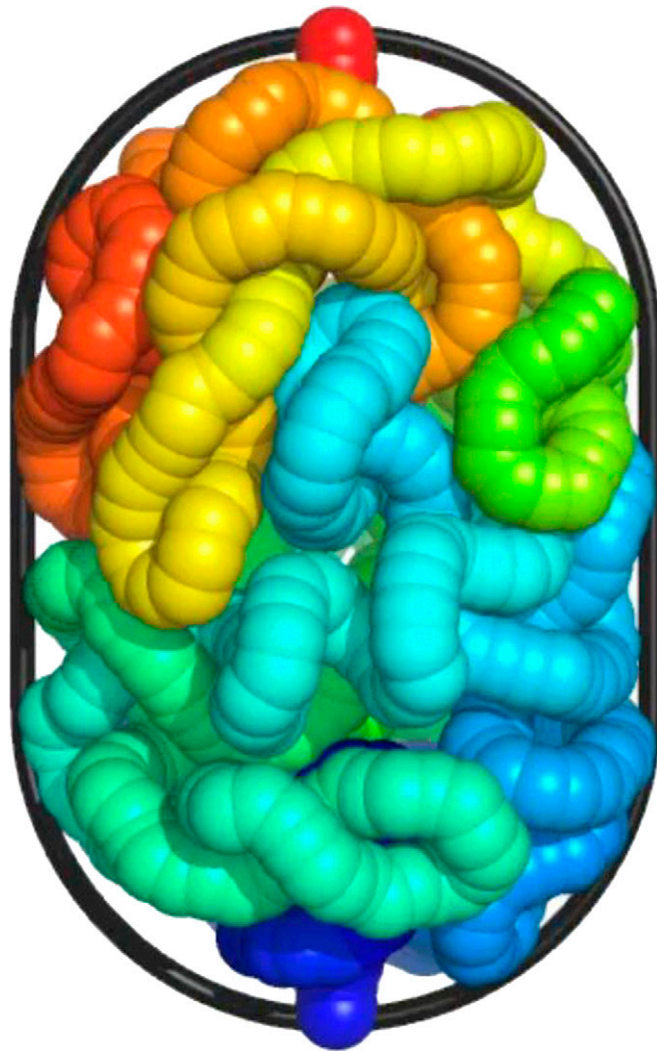

**Movie S2.** Long-time dynamics of confined polymer. Sample Brownian dynamics simulation of the postpackaging, long-time fluctuations of the polymer inside the cell-like confinement. The polymer length (800 beads) corresponds to 24,910 bp. The polymer strand's color varies along its length from blue to red.

[Movie S2](#)

## Other Supporting Information Files

[SI Appendix \(PDF\)](#)
